# Supplementary material for: Updated atmospheric mercury emissions from iron andsteel production in China during 2000–2015
Source: Copernicus journal article supplement (doi:10.5194/acp-2017-87), 2017-03-27
Supplement: Supplementary file 1 [file acp-2017-87-supplement.pdf]

---

**Supporting information for** *“Updated atmospheric mercury emissions from iron and steel production in China during 2000-2015”*

**Q. R. Wu<sup>1,2</sup>, W. Gao<sup>1,2</sup>, S. X. Wang<sup>1,2\*</sup>, J. M. Hao<sup>1,2</sup>**

<sup>1</sup>School of Environment, and State Key Joint Laboratory of Environment Simulation and Pollution Control, Tsinghua University, Beijing 100084, China

<sup>2</sup>State Environmental Protection Key Laboratory of Sources and Control of Air Pollution Complex, Beijing 100084, China

Correspondence to: S. X. Wang ([shxwang@tsinghua.edu.cn](mailto:shxwang@tsinghua.edu.cn))

**11 pages (including cover page)**

**5 Tables (S1, S2, S3, S4, S5)**

1 Table S1. Hg release rate during different processes

| Processes           | Hg release rate (%)     |    |                    |                     |          |            |
|---------------------|-------------------------|----|--------------------|---------------------|----------|------------|
|                     | Wang F. Y. et al., 2016 |    | Zhang et al., 2015 | Fukuda et al., 2011 | Ma, 2008 | This study |
| Roasting            | 98                      |    |                    |                     |          | 98         |
| Coke oven           | 71                      | 90 | 87                 | 94                  | 60       | 80         |
| Sinter/pellet       | 61                      | 91 | 92                 | 96                  |          | 85         |
| Blast furnace       | 99                      | 98 | 94                 | 100                 |          | 98         |
| Oxygen steel making | 73                      | 87 |                    |                     |          | 80         |
| Arc steel making    | 95                      |    |                    |                     |          | 95         |

2 Table S2. Provincial crude steel productions and raw materials consumptions in 2015

| Province       | Crude steel (Mt) | Limestone (Mt) | Dolomite (Mt) | Coking coal (Mt) | PCI coal (Mt) | Iron Concentrates (Mt) | Scrap steel (Mt) | Alloy (Mt) |
|----------------|------------------|----------------|---------------|------------------|---------------|------------------------|------------------|------------|
| Beijing        | 0.0              | 0.0            | 0.0           | 0.0              | 0.0           | 0.0                    | 0.0              | 0.0        |
| Tianjin        | 20.7             | 5.6            | 1.0           | 2.6              | 2.8           | 23.9                   | 2.1              | 0.7        |
| Hebei          | 188.3            | 45.0           | 8.2           | 74.1             | 25.0          | 217.1                  | 19.5             | 6.0        |
| Shanxi         | 38.5             | 11.3           | 2.0           | 108.6            | 5.1           | 44.4                   | 4.0              | 1.2        |
| Inner Mongolia | 17.4             | 4.8            | 0.9           | 41.1             | 2.1           | 20.0                   | 1.8              | 0.6        |
| Liaoning       | 60.7             | 14.9           | 2.7           | 28.3             | 8.7           | 70.0                   | 6.3              | 1.9        |
| Jilin          | 10.7             | 3.1            | 0.6           | 5.0              | 1.4           | 12.3                   | 1.1              | 0.3        |
| Heilongjiang   | 4.2              | 1.9            | 0.3           | 9.3              | 0.6           | 4.8                    | 0.4              | 0.1        |
| Shanghai       | 17.8             | 4.4            | 0.8           | 7.2              | 2.4           | 20.6                   | 1.8              | 0.6        |
| Jiangsu        | 110.0            | 22.6           | 4.1           | 32.9             | 10.1          | 126.8                  | 11.4             | 3.5        |
| Zhejiang       | 15.9             | 4.1            | 0.8           | 4.0              | 1.5           | 18.4                   | 1.7              | 0.5        |
| Anhui          | 25.1             | 6.5            | 1.2           | 13.0             | 3.0           | 28.9                   | 2.6              | 0.8        |
| Fujian         | 15.9             | 4.1            | 0.7           | 2.1              | 1.4           | 18.3                   | 1.6              | 0.5        |
| Jiangxi        | 22.1             | 5.6            | 1.0           | 11.0             | 3.0           | 25.5                   | 2.3              | 0.7        |
| Shandong       | 66.2             | 16.3           | 3.0           | 59.0             | 9.7           | 76.3                   | 6.9              | 2.1        |
| Henan          | 29.0             | 5.9            | 1.1           | 39.8             | 4.2           | 33.4                   | 3.0              | 0.9        |
| Hubei          | 29.2             | 7.8            | 1.4           | 12.4             | 3.3           | 33.7                   | 3.0              | 0.9        |
| Hunan          | 18.5             | 4.4            | 0.8           | 8.9              | 2.5           | 21.4                   | 1.9              | 0.6        |
| Guangdong      | 17.6             | 4.1            | 0.8           | 3.3              | 1.6           | 20.3                   | 1.8              | 0.6        |
| Guangxi        | 21.5             | 4.2            | 0.8           | 7.9              | 1.8           | 24.7                   | 2.2              | 0.7        |
| Hainan         | 0.2              | 0.1            | 0.0           | 0.0              | 0.0           | 0.3                    | 0.0              | 0.0        |
| Chongqing      | 6.9              | 2.1            | 0.4           | 2.9              | 0.5           | 8.0                    | 0.7              | 0.2        |
| Sichuan        | 19.5             | 5.3            | 1.0           | 17.6             | 2.5           | 22.5                   | 2.0              | 0.6        |
| Guizhou        | 4.7              | 1.2            | 0.2           | 9.9              | 0.6           | 5.4                    | 0.5              | 0.1        |
| Yunnan         | 14.2             | 4.6            | 0.8           | 15.5             | 1.8           | 16.4                   | 1.5              | 0.5        |
| Tibet          | 0.0              | 0.0            | 0.0           | 0.0              | 0.0           | 0.0                    | 0.0              | 0.0        |
| Shaanxi        | 10.3             | 2.4            | 0.4           | 49.2             | 1.2           | 11.8                   | 1.1              | 0.3        |
| Gansu          | 8.5              | 2.5            | 0.4           | 7.1              | 1.0           | 9.8                    | 0.9              | 0.3        |
| Qinghai        | 1.2              | 0.4            | 0.1           | 0.0              | 0.2           | 1.4                    | 0.1              | 0.0        |
| Ningxia        | 1.8              | 0.3            | 0.1           | 10.2             | 0.3           | 2.1                    | 0.2              | 0.1        |
| Xinjiang       | 7.4              | 3.0            | 0.5           | 22.2             | 1.1           | 8.5                    | 0.8              | 0.2        |

3 Note: PCI: Pulverized coal injection.

4 Table S3. Productions and consumptions during 2000-2015

| Year | Production (Mt) |          |        |        | Consumption (Mt) |           |          |                   |             |          |             |       |
|------|-----------------|----------|--------|--------|------------------|-----------|----------|-------------------|-------------|----------|-------------|-------|
|      | Crude steel     | Pig iron | Sinter | Pellet | Coke             | Limestone | Dolomite | Iron concentrates | Coking coal | PCI coal | Scrap steel | Alloy |
| 2000 | 127             | 131      | 179    | 19     | 122              | 30        | 6        | 198               | 175         | 19       | 29          | 9     |
| 2001 | 152             | 156      | 193    | 21     | 131              | 36        | 7        | 214               | 188         | 22       | 34          | 11    |
| 2002 | 182             | 171      | 248    | 28     | 116              | 43        | 8        | 276               | 163         | 25       | 39          | 12    |
| 2003 | 222             | 214      | 254    | 35     | 178              | 52        | 10       | 289               | 251         | 31       | 48          | 15    |
| 2004 | 273             | 252      | 304    | 44     | 210              | 64        | 12       | 349               | 292         | 36       | 54          | 17    |
| 2005 | 356             | 345      | 369    | 59     | 254              | 84        | 16       | 428               | 349         | 50       | 63          | 20    |
| 2006 | 421             | 413      | 430    | 76     | 298              | 99        | 19       | 506               | 409         | 59       | 67          | 21    |
| 2007 | 490             | 477      | 524    | 99     | 336              | 115       | 22       | 623               | 459         | 69       | 69          | 21    |
| 2008 | 512             | 483      | 560    | 100    | 324              | 120       | 23       | 660               | 453         | 70       | 72          | 22    |
| 2009 | 577             | 569      | 622    | 106    | 353              | 135       | 26       | 728               | 476         | 82       | 83          | 26    |
| 2010 | 639             | 596      | 688    | 124    | 392              | 157       | 29       | 812               | 529         | 86       | 87          | 27    |
| 2011 | 702             | 645      | 769    | 156    | 432              | 173       | 31       | 925               | 583         | 93       | 91          | 28    |
| 2012 | 731             | 670      | 810    | 136    | 442              | 180       | 33       | 946               | 597         | 96       | 84          | 26    |
| 2013 | 813             | 748      | 887    | 158    | 482              | 203       | 37       | 1044              | 651         | 108      | 86          | 27    |
| 2014 | 822             | 714      | 901    | 139    | 480              | 203       | 37       | 1041              | 648         | 103      | 88          | 27    |
| 2015 | 804             | 691      | 887    | 118    | 448              | 199       | 36       | 1005              | 605         | 100      | 83          | 26    |

5 Note: PCI-pulverized coal injection.

6 Table S4. Application rate, Hg removal efficiency, and Hg speciation profile of APCDs

| Processes              | APCDs <sup>2</sup> | Application rate |             |             |             | Reference <sup>3</sup> | Hg removal        |                        | Hg speciation profile  |                         |                        |                        |
|------------------------|--------------------|------------------|-------------|-------------|-------------|------------------------|-------------------|------------------------|------------------------|-------------------------|------------------------|------------------------|
|                        |                    | 2000<br>(%)      | 2005<br>(%) | 2010<br>(%) | 2015<br>(%) |                        | Efficiency<br>(%) | Reference <sup>2</sup> | Hg <sup>0</sup><br>(%) | Hg <sup>2+</sup><br>(%) | Hg <sub>p</sub><br>(%) | Reference <sup>2</sup> |
| Roasting<br>plant      | CYC/NOC            | 97               | 92          | 32          | 0           | (1)-(4)                | 1                 | (5)-(6)                | 38                     | 38                      | 24                     | (5)-(6)                |
|                        | WS                 | 3                | 8           | 18          | 0           |                        | 23                | (5)-(6)                | 65                     | 34                      | 1                      | (5)-(6)                |
|                        | ESP                | 0                | 0           | 25          | 50          |                        | 29                | (7)                    | 14                     | 85                      | 1                      | (7)                    |
|                        | FF                 | 0                | 0           | 25          | 50          |                        | 67                | (6)                    | 48                     | 52                      | 0                      | (10)                   |
| Coke oven              | NOC <sup>1</sup>   | 100              | 100         | 100         | 100         | (1)-(4)                | 0                 | (6)                    | 60                     | 35                      | 5                      | (9)                    |
|                        | Cooler             | 100              | 100         | 75          | 50          |                        | 70                | (5)-(6)                | 46                     | 53                      | 1                      | (5)-(6)                |
|                        | Cooler+WS          | 0                | 0           | 25          | 50          |                        | 93                | (6)                    | 65                     | 34                      | 1                      | (6)                    |
| Sinter/Pellet<br>plant | CYC                | 20               | 5           | 0           | 0           | (1)-(4)                | 1                 | (5)-(6)                | 38                     | 38                      | 24                     | (5)-(6)                |
|                        | WS                 | 40               | 20          | 5           | 0           |                        | 23                | (5)-(6)                | 65                     | 34                      | 1                      | (5)-(6)                |
|                        | ESP                | 40               | 65          | 50          | 25          |                        | 29                | (7)                    | 18                     | 82                      | 0                      | (7)                    |
|                        | FF                 | 0                | 10          | 13          | 15          |                        | 67                | (6)                    | 18                     | 82                      | 0                      | (7)                    |
|                        | ESP+WFGD           | 0                | 0           | 25          | 50          |                        | 57                | (7)                    | 41                     | 59                      | 0                      | (7)                    |
|                        | ESP+DFGD+FF        | 0                | 0           | 7           | 10          |                        | 72                | (7)                    | 0.5                    | 99                      | 0.5                    | (7)                    |
| Blast furnace          | WS+Venturi         | 100              | 100         | 90          | 80          | (1)-(4)                | 45                | (7)-(8)                | 65                     | 30                      | 5                      | (7)                    |
|                        | FF                 | 0                | 0           | 10          | 20          |                        | 67                | (7)                    | 38                     | 61                      | 1                      | (6)                    |
| Oxygen steel<br>making | WS                 | 50               | 40          | 88          | 78          | (1)-(4)                | 38                | (7)                    | 65                     | 34                      | 1                      | (5)-(6)                |
|                        | ESP                | 50               | 60          | 12          | 22          |                        | 68                | (7)                    | 57                     | 43                      | 0                      | (7)                    |
| Arc steel<br>making    | WS                 | 85               | 60          | 30          | 0           | (1)-(4)                | 23                | (5)-(6)                | 65                     | 34                      | 1                      | (5)-(6)                |
|                        | ESP                | 10               | 30          | 47          | 37          |                        | 29                | (7)                    | 58                     | 41                      | 1                      | (6)                    |
|                        | FF                 | 5                | 10          | 23          | 63          |                        | 35                | (7)                    | 92                     | 8                       | 0                      | (7)                    |

---

7 Note: 1. Specific for indigeous coke making process;  
8 2. NOC-None of control;CYC-Cyclone; WS-Wet scrubber; ESP-Electrostatic precipitator; FF- Fabric filter; WFGD: Wet flue gas desulfurization towers;  
9 3. (1)Wang et al., 2014; (2)Zhao et al., 2013; (3)CISIA, 2001-2016; (4)NBS, 2001-2016; (5)Zhang et al., 2015; (6)Wu et al., 2016; (7)Wang F.Y. et al., 2016;  
10 (8)Zhang, 2012; (9)Li, 2011; (10)Yang, 2014.

11 Table S5. Comparison of emission factors from different studies

| Region                                       | APCDs <sup>1</sup> | Emission factor | Note                                                                            | References <sup>2</sup> |
|----------------------------------------------|--------------------|-----------------|---------------------------------------------------------------------------------|-------------------------|
| <b>Whole process (unit: g/t crude steel)</b> |                    |                 |                                                                                 |                         |
| Global                                       | -                  | 0.0400          | Sinter/Pellet plant + Blast furnace                                             | (1)-(6)                 |
| Global                                       |                    | 0.0413          | Coke oven + Sinter/Pellet plant + Blast furnace + Oxygen steel making           | (7)                     |
| Europe                                       | -                  | 0.1000          | Coke oven + Sinter/Pellet plant + Blast furnace                                 | (8)                     |
| Japan                                        |                    | 0.0488          | Coke oven + Sinter/Pellet plant + Blast furnace                                 | (9)                     |
| China (2000)                                 |                    | 0.0527          | Sinter/Pellet plant + Blast furnace                                             | This study              |
| China (2015)                                 |                    | 0.0296          | Sinter/Pellet plant + Blast furnace                                             | This study              |
| China (2000)                                 | -                  | 0.0590          | Sinter/Pellet plant + Blast furnace + Steel making                              | This study              |
| China (2015)                                 |                    | 0.0320          | Sinter/Pellet plant + Blast furnace + Steel making                              | This study              |
| China (2000)                                 | -                  | 0.0818          | Coke oven + Sinter/Pellet plant + Blast furnace + Steel making                  | This study              |
| China (2015)                                 |                    | 0.0363          | Coke oven + Sinter/Pellet plant + Blast furnace + Steel making                  | This study              |
| China (2000)                                 | -                  | 0.0902          | Roasting plant + Coke oven + Sinter/Pellet plant + Blast furnace + Steel making | This study              |
| China (2015)                                 | -                  | 0.0407          | Roasting plant + Coke oven + Sinter/Pellet plant + Blast furnace + Steel making | This study              |
| <b>Roasting plant (unit: g/t lime)</b>       |                    |                 |                                                                                 |                         |
| Global                                       | -                  | 0.0074          | Roasting plant                                                                  | (10)                    |
| China (2000)                                 | -                  | 0.0663          | Roasting plant                                                                  | This study              |
| China (2015)                                 | -                  | 0.0439          | Roasting plant                                                                  | This study              |
| <b>Coke oven (unit: g/t coke)</b>            |                    |                 |                                                                                 |                         |
| Europe                                       | -                  | 0.2185          | Coke oven                                                                       | (8)                     |
| Germany                                      | -                  | 0.01-0.03       | Coke oven                                                                       | (10)                    |
| China (2000)                                 | -                  | 0.0238          | Coke oven                                                                       | This study              |

|                                              |                     |        |                     |                 |
|----------------------------------------------|---------------------|--------|---------------------|-----------------|
| China<br>(2015)                              | -                   | 0.0077 | Coke oven           | This study      |
| <b>Sinter plant (unit: g/t sinter)</b>       |                     |        |                     |                 |
| Europe                                       | -                   | 0.0490 | Sinter plant        | (8), (11)       |
| Europe                                       | ESP+WS              | 0.1040 | Sinter plant        | (8), (11)       |
| Europe                                       | WFGD                | 0.0180 | Sinter plant        | (8), (11)       |
| Europe                                       | dry ESP             | 0.0090 | Sinter plant        | (8), (11)       |
| Europe                                       | ACI+FF              | 0.0060 | Sinter plant        | (8), (11)       |
| Japan                                        | ESP                 | 0.1251 | Sinter plant        | (8), (11)       |
| Japan                                        | ESP+FGD             | 0.0718 | Sinter plant        | (8), (11)       |
| Japan                                        | ESP+AC              | 0.2962 | Sinter plant        | (8), (11)       |
| Korea                                        | dry ESP             | 0.0427 | Sinter plant        | (12)            |
| China<br>(2000)                              | -                   | 0.0243 | Sinter plant        | This study      |
| China<br>(2015)                              | -                   | 0.0158 | Sinter plant        | This study      |
| <b>Pellet plant (unit: g/t pellet)</b>       |                     |        |                     |                 |
| Europe                                       | -                   | 0.2000 | Pellet plant        | (8), (11)       |
| China<br>(2000)                              | -                   | 0.0255 | Pellet plant        | This study      |
| China<br>(2015)                              | -                   | 0.0165 | Pellet plant        | This study      |
| <b>Blast furnace (unit: g/t pig iron)</b>    |                     |        |                     |                 |
| Russia                                       | -                   | 0.0395 | Blast furnace       | (12)            |
| Europe                                       | -                   | 0.0001 | Blast furnace       | (8), (11)       |
| Europe                                       | FF/Heat<br>recovery | 0.0002 | Blast furnace       | (8), (11), (13) |
| Europe                                       | dry ESP             | 0.0001 | Blast furnace       | (8), (11)       |
| Japan                                        | -                   | 0.0014 | Blast furnace       | (9)             |
| China<br>(2000)                              | -                   | 0.0142 | Blast furnace       | This study      |
| China<br>(2015)                              | -                   | 0.0114 | Blast furnace       | This study      |
| <b>Oxygen steel making (g/t crude steel)</b> |                     |        |                     |                 |
| Europe                                       | dry ESP             | 0.0006 | Oxygen steel making | (8), (11)       |
| China                                        | FF                  | 0.0019 | Oxygen steel making | (13)            |
| China<br>(2000)                              | -                   | 0.0023 | Oxygen steel making | This study      |
| China<br>(2015)                              | -                   | 0.0018 | Oxygen steel making | This study      |



---

**Arc steel making (g/t crude steel)**

|                 |         |        |                  |                 |
|-----------------|---------|--------|------------------|-----------------|
| Europe          | -       | 0.0500 | Arc steel making | (8), (11)       |
| Europe          | FF      | 0.0761 | Arc steel making | (8), (11), (13) |
| Europe          | dry ESP | 0.0240 | Arc steel making | (8), (11)       |
| Korea           | FF      | 0.0190 | Arc steel making | (12)            |
| China<br>(2000) | -       | 0.0272 | Arc steel making | This study      |
| China<br>(2015) | -       | 0.0162 | Arc steel making | This study      |

---

- 12 Note: 1. ESP-Electrostatic precipitator; FF-Fabric filter; (W)FGD-(Wet) flue gas desulfurization  
13 towers; ACI-Activated carbon injection; AC-Activated coke adsorption tower
- 14 2. (1)Pacyna and Pacyna, 2002; (2)Pacyna et al., 2006; (3)Pacyna et al., 2010; (4)AMAP/UNEP,  
15 2008; (5)Zhang et al., 2015; (6)Wu et al., 2016; (7)AMAP/UNEP, 2013; (8)EMEP/EEA, 2013;  
16 (9)Fukuda et al., 2011; (10)UNEP, 2005; (11)EMEP/CORINAIR, 2001; (12)Kim et al., 2010;  
17 (13)ACAP, 2005; (13)Wang K. et al., 2016

---

18 **Reference**

- 19 Arctic Council Action Plan (ACAP): Assessment of mercury releases from the Russian Federation,  
20 ACAP, Washton D. C., United States, 2005.
- 21 Arctic Monitoring and Assessment Programme and United Nations Environment Programme  
22 (AMAP/UNEP): Technical background report to the global atmospheric mercury assessment,  
23 AMAP/UNEP, Geneva, Switzerland, 2008.
- 24 Arctic Monitoring and Assessment Programme and United Nations Environment Programme  
25 (AMAP/UNEP): Technical background report for the global mercury assessment, AMAP/UNEP,  
26 Geneva, Switzerland, 2013.
- 27 China Iron and Steel Industry Association (CISIA): China Steel yearbook, CISIA, Beijing, China,  
28 2001-2016.
- 29 European Monitoring and Evaluation Programme/Core Inventory of Air Emissions Project  
30 (EMEP/CORINAIR): Emission inventory guidebook, EMEP/CORINAIR, Copenhagen, Denmark,  
31 2001.
- 32 European Monitoring and Evaluation Programme/European Economic Area (EMEP/EEA): Air pollutant  
33 emission inventory guidebook 2013, EMEP/EEA, Copenhagen, Danmark, 2013.
- 34 Fukuda, N., Takaoka, M., Doumoto, S., Oshita, K., Morisawa, S., and Mizuno, T.: Mercury emission and  
35 behavior in primary ferrous metal production, *Atmos. Environ.*, 45, 3685-3691, 2011.
- 36 Kim, J. H., Park, J. M., Lee, S. B., Pudasainee, D., and Seo, Y. C.: Anthropogenic mercury emission  
37 inventory with emission factors and total emission in Korea, *Atmos. Environ.*, 44, 2714-2721,  
38 2010.
- 39 Li, Y.: Experimental study on emission and high temperature control of trace elements during coal  
40 gasification, Doctor thesis, Huazhong University of Science and Technology, Thermoal engineering,  
41 Wuhan, China, 144, 2011.
- 42 Ma, J.: Study on the transformation of hazardous trace elements during the coal-coking, Master thesis,  
43 Wuhan University of Science and Technology, School of chemical engineering and technology,  
44 Wuhan, China, 67, 2008.
- 45 National Statistical Bureau of China (NBS): China Environmental Statistics Yearbook, NBS, Beijing,  
46 China, 2001-2016.
- 47 Pacyna, E. G., and Pacyna, J. M.: Global emission of mercury from anthropogenic sources in 1995,  
48 *Water Air Soil Pollut.*, 137, 149-165, 2002.
- 49 Pacyna, E. G., Pacyna, J. M., Steenhuisen, F., and Wilson, S.: Global anthropogenic mercury emission  
50 inventory for 2000, *Atmos. Environ.*, 40, 4048-4063, 2006.
- 51 Pacyna, E. G., Pacyna, J. M., Sundseth, K., Munthe, J., Kindbom, K., Wilson, S., Steenhuisen, F., and  
52 Maxson, P.: Global emission of mercury to the atmosphere from anthropogenic sources in 2005 and  
53 projections to 2020, *Atmos. Environ.*, 44, 2487-2499, 2010.
- 54 United Nations Environment Programme (UNEP): Toolkit for identification and quantification of

---

55 mercury release Geneva, Switzerland M,2005.

56 Wang, F. Y., Wang, S. X., Zhang, L., Yang, H., Gao, W., Wu, Q. R., and Hao, J. M.: Mercury mass flow in  
57 iron and steel production process and its implications for mercury emission control, *J. Environ. Sci.*,  
58 43, 293-301, 2016.

59 Wang, K., Tian, H. Z., Hua, S. B., Zhu, C. Y., Gao, J. J., Xue, Y. F., Hao, J. M., Wang, Y., and Zhou, J. R.:  
60 A comprehensive emission inventory of multiple air pollutants from iron and steel industry in China:  
61 Temporal trends and spatial variation characteristics, *Sci. Total Environ.*, 559, 7-14, 2016.

62 Wang, S. X., Zhao, B., Cai, S. Y., Klimont, Z., Nielsen, C. P., Morikawa, T., Woo, J. H., Kim, Y., Fu, X.,  
63 Xu, J. Y., Hao, J. M., and He, K. B.: Emission trends and mitigation options for air pollutants in East  
64 Asia, *Atmos. Chem. Phys.*, 14, 6571-6603, 2014.

65 Wu, Q., Wang, S., Li, G., Liang, S., Lin, C.-J., Wang, Y., Cai, S., Liu, K., and Hao, J.: Temporal Trend  
66 and Spatial Distribution of Speciated Atmospheric Mercury Emissions in China During 1978–2014,  
67 *Environ. Sci. Technol.*, 50, 13428-13435, 2016.

68 Yang, H.: Research on the characteristic and control strategy of mercury emission from cement  
69 production industry Master thesis, Tsinghua University, School of Environment, Beijing, China,  
70 2014.

71 Zhang, L.: Emission characteristics and synergistic control strategies of atmospheric mercury from coal  
72 combustion in China, Ph.D. Dissertation, Tsinghua University, School of Environment, Beijing,  
73 China, 2012.

74 Zhang, L., Wang, S. X., Wang, L., Wu, Y., Duan, L., Wu, Q. R., Wang, F. Y., Yang, M., Yang, H., Hao, J.  
75 M., and Liu, X.: Updated emission inventories for speciated atmospheric mercury from  
76 anthropogenic sources in China, *Environ. Sci. Technol.*, 49, 3185-3194, 2015.

77 Zhao, B., Wang, S. X., Liu, H., Xu, J. Y., Fu, K., Klimont, Z., Hao, J. M., He, K. B., Cofala, J., and  
78 Amann, M.: NO<sub>x</sub> emissions in China: historical trends and future perspectives, *Atmos. Chem.*  
79 *Phys.*, 13, 9869-9897, 2013.

80
